# Supplementary material for: Reversal of diet-induced hepatic steatosis and hepatic insulin resistance by antisense oligonucleotide inhibitors of acetyl-CoA carboxylases 1 and 2
Source: JCI journal article supplement (doi:10.1172/jci27300), 2006-02-16
Supplement: sd1 [file 1]

**Supplementary Table 1**

RT-PCR primer sequences

| <b>Gene</b>  | <b>Primer sequence</b>                               |
|--------------|------------------------------------------------------|
| <i>ACC1</i>  | F: ATTGTGGCTCAAACCTGCAGGT<br>R: GCCAATCCACTCGAAGACCA |
| <i>ACC2</i>  | F: CAACATCCGTCAGACGACCTC<br>R: CGGACTCGTTGGTGATGAAGA |
| <i>PEPCK</i> | F: ATGACACCCTCCTCCTGCAT<br>R: CAGGAAGTGAGGAAGTTTGTGG |
| <i>G6P</i>   | F: GAAGGCCAAGAGATGGTGTGA<br>R: TGCAGCTCTTGCGGTACATG  |
| <i>18s</i>   | F: TTCCGATAACGAACGAGACTCT<br>R: TGGCTGAACGCCACTTGTC  |

# Supplementary figure 1

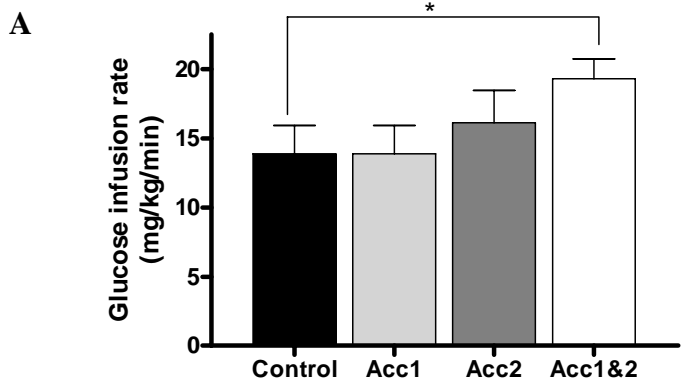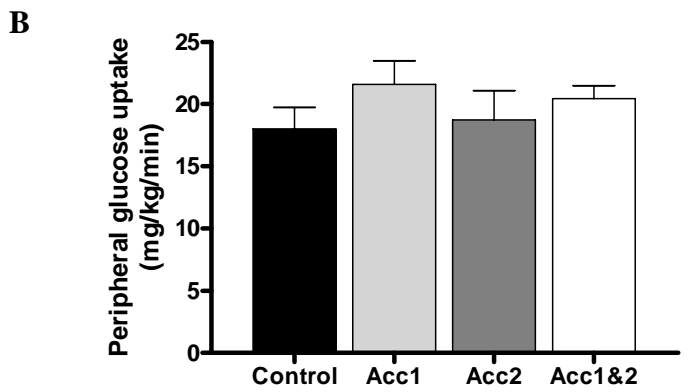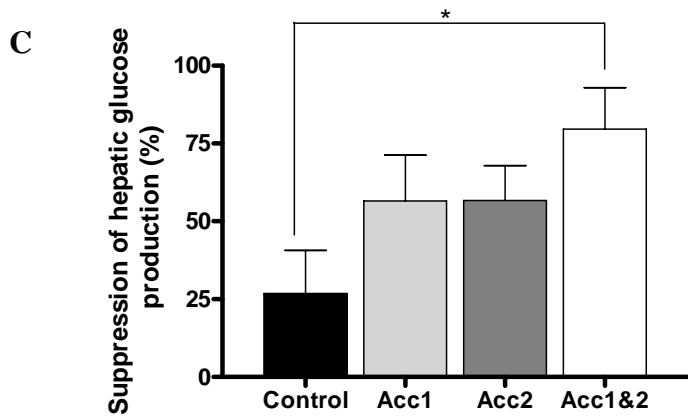

### **Supplementary figure 1**

Peripheral and hepatic insulin sensitivity were assessed by means of hyperinsulinemic-euglycemic clamps (**A-C**) in control (ASOctrl), Acc1, Acc2 and Acc1&2 ASO treated rats. (**A**) Glucose infusion rates; (**B**) peripheral glucose disposal (Rd); (**C**) suppression of hepatic glucose production (HGP) during hyperinsulinemic-euglycemic clamps. Data are expressed as mean values  $\pm$  SEM for 6-9 rats per treatment group. \* $P < 0.05$  vs ASOctrl treatment group.
